# Supplementary material
Source: HighWire-hosted journal article supplement (https://hyp.is/content/suppl/2021/03/11/jcs.250720)
Supplement: JCS250720supp.pdf [file JCS250720supp.pdf]

Hypothesis annotation for jcs.biologists.org


Loading annotation for jcs.biologists.org
